# Supplementary material
Source: PubMed Central journal article supplement (PMC3092186)
Supplement: supp_1947601910361749_02GANC-Huber_DS_10.1177_1947601910361749_TableS1.pdf [file supp_1947601910361749_02GANC-Huber_DS_10.1177_1947601910361749_TableS1.pdf]

**Supplementary Table 1. Kinase selectivity profile of BI 5700**

| Kinase         | IC50 (nM) | Kinase   | IC50 (nM) |
|----------------|-----------|----------|-----------|
| IKK-2          | 9         | JAK3     | >10 000   |
| IKK-1          | 594       | JNK1     | >10 000   |
| IKK $\epsilon$ | >10 000   | KIT      | >10 000   |
| TBK1           | >10 000   | LCK      | >10 000   |
| ABL1           | >10 000   | MAP4K4   | >10 000   |
| ACVR1B         | >10 000   | MAPK1    | >10 000   |
| AKT1           | >10 000   | MAPKAPK2 | >10 000   |
| ALK            | >10 000   | MARK2    | >10 000   |
| AMPK A1/B1/G1  | >10 000   | MEK1     | >10 000   |
| AURKA          | >10 000   | MET      | >10 000   |
| AXL            | 5 550     | NEK1     | >10 000   |
| BRAF           | >10 000   | NTRK1    | >10 000   |
| BTK            | >10 000   | PAK4     | >10 000   |
| CDK1           | >10 000   | PDGFRB   | 7 500     |
| CHEK1          | >10 000   | PDK1     | >10 000   |
| CSF1R          | >10 000   | PHKG2    | >10 000   |
| CSK            | >10 000   | PIM1     | >10 000   |
| CK1 gamma 2    | >10 000   | PLK1     | >10 000   |
| CK2 alpha 1    | >10 000   | PRKACA   | 8 120     |
| DYRK1B         | >10 000   | PRKCB1   | >10 000   |
| EGFR           | >10 000   | PTK2B    | >10 000   |
| EPHA2          | >10 000   | RET      | 9 260     |
| FGFR1          | >10 000   | ROCK1    | 2 730     |
| FLT3           | 721       | RSK2     | >10 000   |
| FRAP1 (mTOR)   | >10 000   | S6K      | >10 000   |
| GSK3B          | >10 000   | SRC      | >10 000   |
| HER2           | >10 000   | SYK      | >10 000   |
| IGF1R          | >10 000   | TGFBR1   | >10 000   |
| INSR           | >10 000   | Tie2     | >10 000   |
| IRAK4          | >10 000   | VEGFR2   | >10 000   |

We determined the inhibitory activity of BI 5700 against a panel of tyrosine and serine/threonine kinases. Kinase assays were performed by contract research organizations, or reagents were obtained from commercial sources and assays were performed according to the supplier's instructions. Appropriate positive and negative controls were included in the assay design.
